# Supplementary material for: Study protocol for the road to hierarchical diabetes management at primary care (ROADMAP) study in China: a cluster randomised controlled trial
Source: PubMed Central journal article supplement — BMJ Open. 2020 Jan 6;10(1):e032734. doi: 10.1136/bmjopen-2019-032734 (PMC6955560; doi:10.1136/bmjopen-2019-032734), 2020-01-06
Supplement: bmjopen-2019-032734supp004.pdf [file bmjopen-2019-032734supp004.pdf]

## User interface display of the Graded ROADMAP App

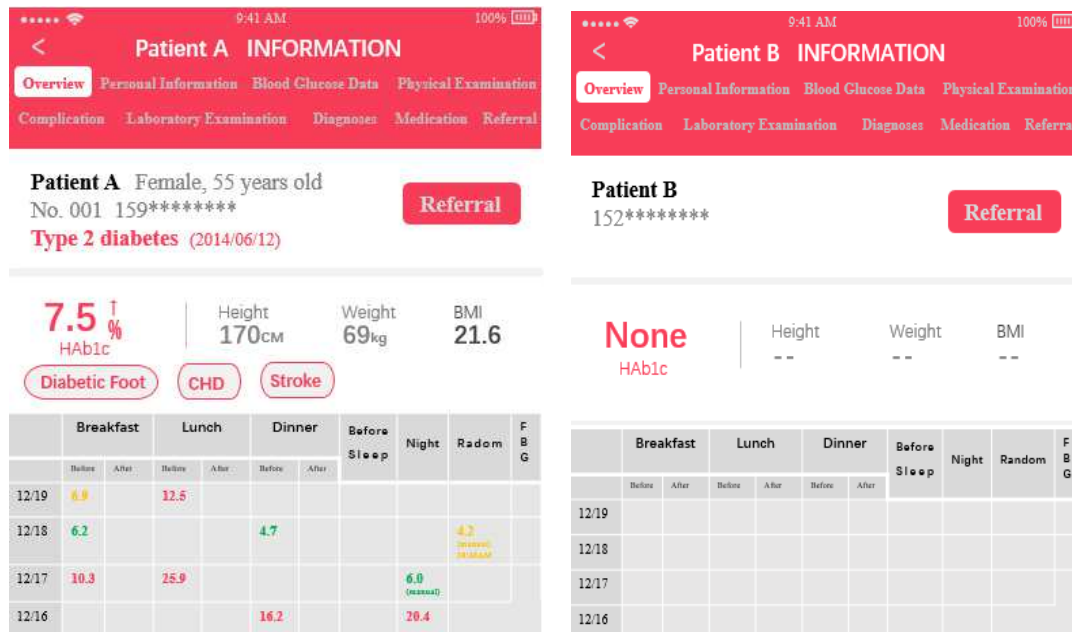

Figure a. User interface of patient's health record at each planned follow-up (community doctor's end)

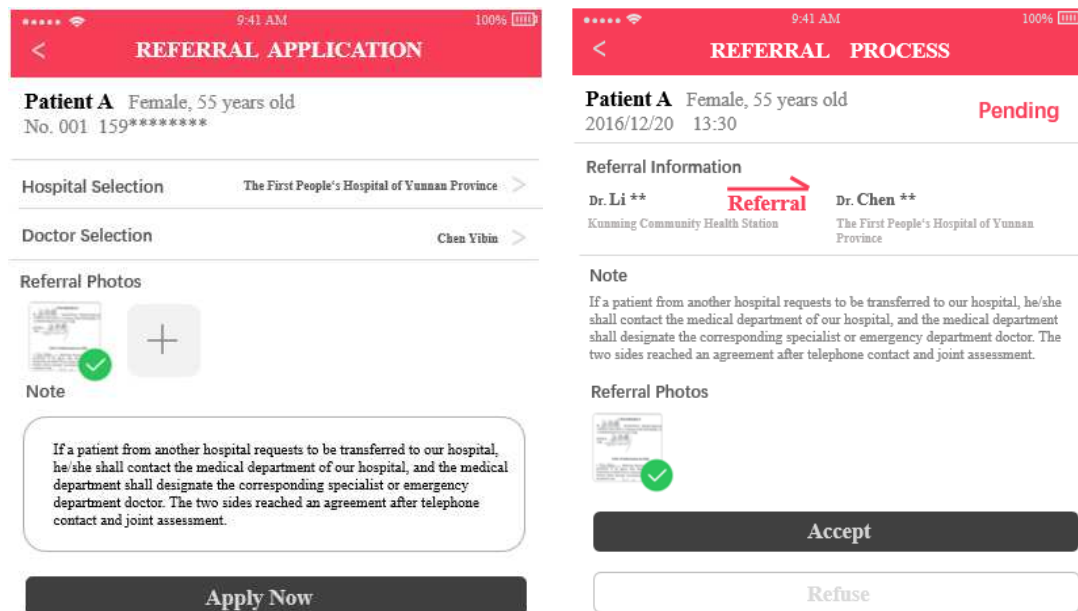

Figure b. User interface of referral request and response

(Left: Referral applied from the tier I community doctor's end; Right: Referral accepted or refused from the tier III hospital doctor's end)
